# Supplementary material for: Efficacy and Safety of Auricular Acupuncture for Cognitive Impairment and Dementia: A Systematic Review
Source: Evid Based Complement Alternat Med. 2018 May 31;2018:3426078. doi: 10.1155/2018/3426078 (PMC6000857; doi:10.1155/2018/3426078)
Supplement: Supplementary Materials — include the search terms for each database described in Materials and Methods and PRISMA checklist of this review. Supplement 1: search strategy used in all databases; Supplement 2: PRISMA checklist. [file 3426078.f1.zip]

Archive with 2 entries (2 files):
- revised Supple 2.docx
- Supple 1.docx
